# Supplementary material for: Some comments on experimental results of three lift controllers for a wind turbine blade section using an active flow control
Source: Copernicus journal article supplement (doi:10.5194/wes-2024-15), 2024-02-14
Supplement: Supplementary file 1 [file wes-2024-15-supplement.zip]

# WindXP\_Statistic\_all\_control

| Scenario                 | Control law | SSE avg   | STD avg   | VarU avg   | file name  |
|--------------------------|-------------|-----------|-----------|------------|------------|
| vent_19.3                | _MFC        | 1.067e+00 | 2.183e-02 | 4.767e-02  | MFC_13a    |
| vent_19.3                | _STW        | 3.649e-01 | 1.193e-02 | 9.710e-03  | STW_193    |
| vent_19.3                | PIDa        | 3.227e+00 | 3.781e-02 | -3.815e-02 | PIDa_193   |
| vent_19.3                | PIDb        | 7.794e-01 | 1.859e-02 | -2.247e-02 | PIDb_193   |
| vent_19.3                | PIDc        | 2.542e+00 | 3.176e-02 | 9.439e-02  | PIDc_B_24  |
| chopper_0.6pc            | _MFC        | 5.413e-01 | 1.502e-02 | 3.214e-03  | MFC_6      |
| chopper_0.6pc            | _STW        | 9.518e-01 | 1.050e-02 | 8.339e-03  | STW_B_6b   |
| chopper_0.6pc            | PIDa        | 5.024e+00 | 4.830e-02 | 6.679e-03  | PIDa_B_4   |
| chopper_0.6pc            | PIDb        | 4.045e+00 | 3.823e-02 | 4.268e-02  | PIDb_B_12  |
| chopper_0.6pc            | PIDc        | 1.840e+00 | 2.582e-02 | 2.203e-02  | PIDc_B_20  |
| chopper_0.6pc_impact21.4 | _MFC        | 1.497e+00 | 2.634e-02 | 5.835e-02  | MFC_B_11   |
| chopper_0.6pc_impact21.4 | _STW        | 6.738e-01 | 1.422e-02 | 1.231e-02  | STW_B_11   |
| chopper_0.6pc_impact21.4 | PIDa        | 4.539e+00 | 4.273e-02 | 1.248e-02  | PIDa_B_6   |
| chopper_0.6pc_impact21.4 | PIDb        | 1.334e+00 | 2.542e-02 | -2.402e-01 | PIDb_B_14  |
| chopper_0.6pc_impact21.4 | PIDc        | 1.110e+00 | 2.283e-02 | 9.666e-02  | PIDc_B_22  |
| chopper_2.5pc_impact21.4 | _MFC        | 8.274e+00 | 5.295e-02 | -7.555e-01 | MFC_B_12   |
| chopper_2.5pc_impact21.4 | _STW        | 7.458e+00 | 3.396e-02 | -1.947e-01 | STW_B_12b  |
| chopper_2.5pc_impact21.4 | PIDa        | 1.152e+01 | 6.547e-02 | -5.285e-01 | PIDa_B_7   |
| chopper_2.5pc_impact21.4 | PIDb        | 1.035e+01 | 5.104e-02 | -1.666e+00 | PIDb_B_15  |
| chopper_2.5pc_impact21.4 | PIDc        | 6.166e+00 | 4.583e-02 | -1.149e+00 | PIDc_B_23  |
| chopper_2.5pc            | _MFC        | 4.044e+00 | 4.430e-02 | 6.706e-03  | MFC_7a     |
| chopper_2.5pc            | _STW        | 2.239e+00 | 3.121e-02 | -1.387e-03 | STW_7      |
| chopper_2.5pc            | PIDa        | 1.004e+01 | 6.966e-02 | 2.004e-02  | PIDa_B_5   |
| chopper_2.5pc            | PIDb        | 7.731e+00 | 5.537e-02 | 1.955e-01  | PIDb_B_13  |
| chopper_2.5pc            | PIDc        | 5.803e+00 | 4.717e-02 | -6.680e-02 | PIDc_B_21  |
| chopper_pm2.5pc          | _MFC        | 2.085e+00 | 2.939e-02 | -3.979e-02 | MFC_7c     |
| chopper_pm2.5pc          | _STW        | 1.666e+00 | 2.313e-02 | -1.070e-02 | STW_7b     |
| chopper_pm2.5pc          | PIDa        | 7.236e+00 | 5.476e-02 | -1.738e-02 | PIDa_B_5b  |
| chopper_pm2.5pc          | PIDb        | 5.949e+00 | 4.697e-02 | 1.643e-01  | PIDb_B_13b |
| chopper_pm2.5pc          | PIDc        | 5.118e+00 | 4.317e-02 | -1.062e-01 | PIDc_B_21b |
